# Supplementary material for: Algal richness in BSCs in forests under different management intensity with some implications for P cycling
Source: Copernicus journal article supplement (doi:10.5194/bg-15-4181-2018), 2018-07-11
Supplement: Supplementary file 1 [file bg-15-4181-2018-supplement.zip]

Archive with 2 entries (2 files):
- Supp table 1.xlsx
- bg-15-4181-2018-supplement-title-page.pdf
