# Supplementary material for: Algal richness in BSCs in forests under different management intensity with some implications for P cycling
Source: Copernicus journal article supplement (doi:10.5194/bg-15-4181-2018), 2018-07-11
Supplement: Supplementary file 1 [file bg-15-4181-2018-supplement.zip › bg-15-4181-2018-supplement-title-page.pdf]

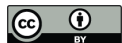

## *Supplement of*

# **Algal richness in BSCs in forests under different management intensity with some implications for P cycling**

**Karin Glaser et al.**

*Correspondence to:* Karin Glaser ([karin.glaser@uni-rostock.de](mailto:karin.glaser@uni-rostock.de))

- [bg-15-4181-2018-supplement-title-page.pdf](#)
- [Supp table 1.xlsx](#)

The copyright of individual parts of the supplement might differ from the CC BY 4.0 License.
